# Supplementary material
Source: Springer Nature journal article supplement (https://www.springermedizin.de/resource/supplementary/12936_2012_2599_MOESM8_ESM.pdf/9542970)

## Proportions of cured

ARS+MQ

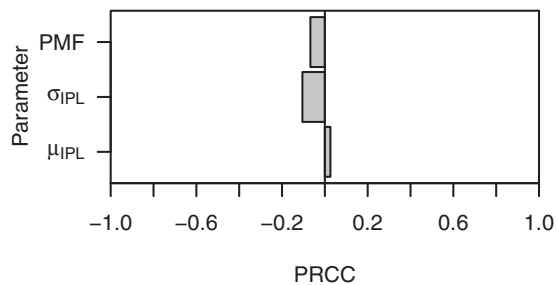

## PCTs

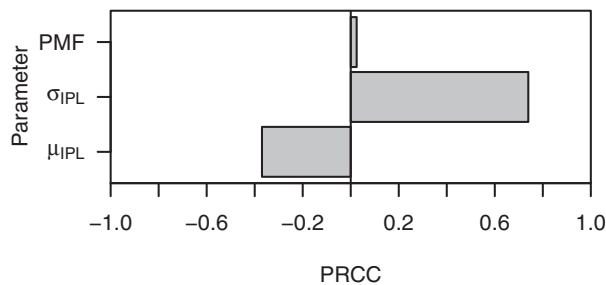

DHA+PQ

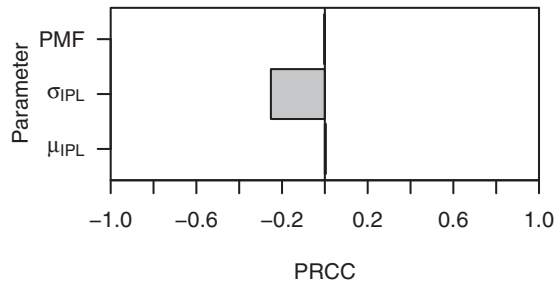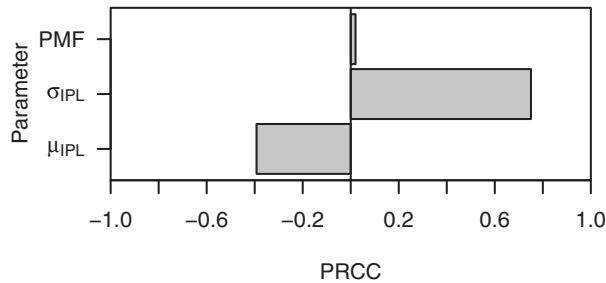

ART+LF

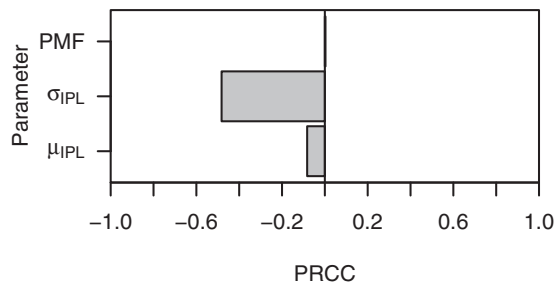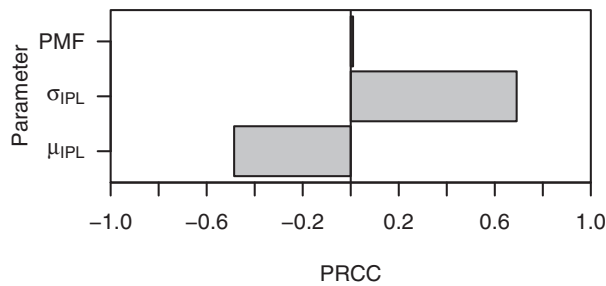

Supplement: MOESM8 [file 9542970]
